# Supplementary material for: Interaction of LiYF4:Yb3+/Er3+/Ho3+/Tm3+@LiYF4:Yb3+ upconversion nanoparticles, molecularly imprinted polymers, and templates
Source: Royal Society of Chemistry journal article supplement (doi:10.1039/d0ra05771a), 2020-01-01

**Figure S1** XRD patterns of  $\text{LiYF}_4:\text{Yb}^{3+}_{0.25}/\text{Ho}^{3+}_{0.01}/\text{Tm}^{3+}_{0.01}/\text{Er}^{3+}_{0.01}$  core and  $\text{LiYF}_4:\text{Yb}^{3+}_{0.25}/\text{Ho}^{3+}_{0.01}/\text{Tm}^{3+}_{0.01}/\text{Er}^{3+}_{0.01}@\text{LiYF}_4:\text{Yb}^{3+}_{0.20}$  core/shell nanoparticles.

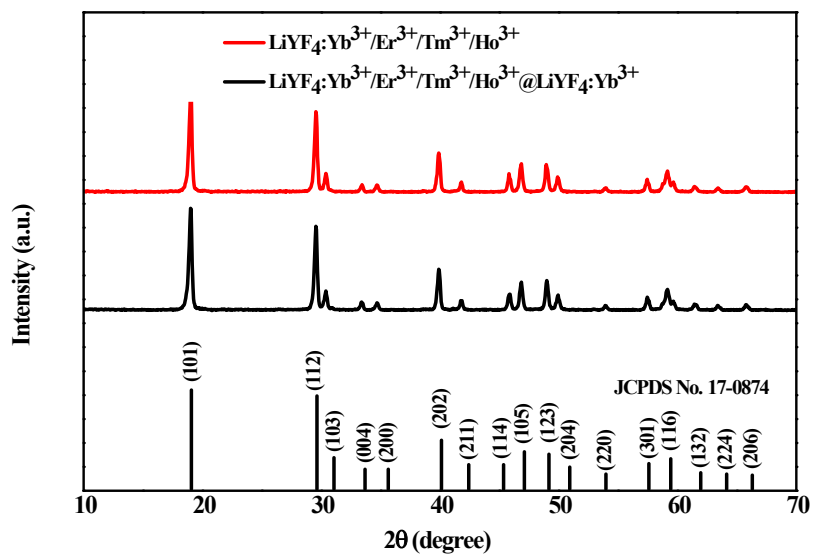

**Figure S2** The size (hydrodynamic diameter) of AA-, AAm-, and TBAm-made UCNPs@MIP was determined by using dynamic light scattering (DSL) was about 2084, 1396, and 435 nm, respectively.

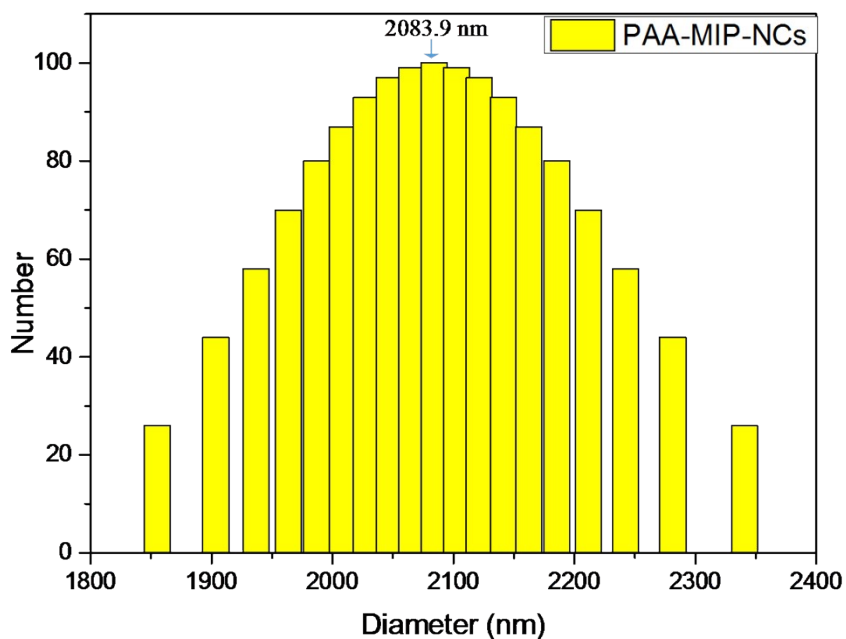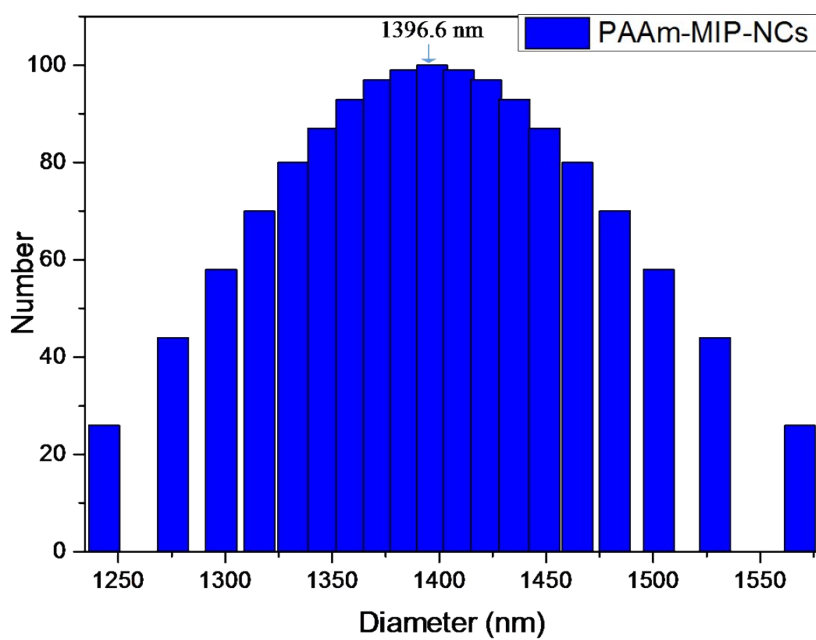

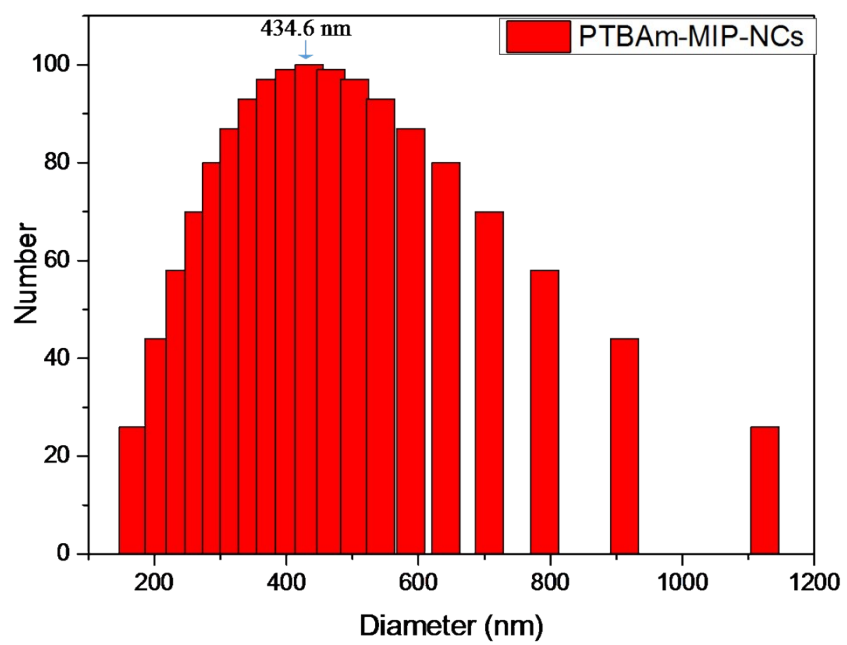

Supplement: d0ra05771a1.pdf [file d0ra05771a1.pdf]
